# Supplementary material for: Comparative Genomics of Plant-Associated Pseudomonas spp.: Insights into Diversity and Inheritance of Traits Involved in Multitrophic Interactions
Source: PLOS journal article supplement (doi:10.1371/journal.pgen.1002784), 2012-07-05
Supplement: S14 (10.1371/journal.pgen.1002784.s014) [file journal.pgen.1002784.s014]

**Table S4.** The number of CDSs shared among genomes in the *Pseudomonas fluorescens* group<sup>a</sup>

| Strains | Pf-5 | 30-84 | O6   | Pf0-1 | Q8r1-96 | Q2-87 | BG33R | SBW25 | A506 | SS101 |
|---------|------|-------|------|-------|---------|-------|-------|-------|------|-------|
| Pf-5    |      |       |      |       |         |       |       |       |      |       |
| 30-84   | 4310 |       |      |       |         |       |       |       |      |       |
| O6      | 4385 | 5233  |      |       |         |       |       |       |      |       |
| Pf0-1   | 3968 | 4120  | 4154 |       |         |       |       |       |      |       |
| Q8r1-96 | 3821 | 3904  | 3935 | 3948  |         |       |       |       |      |       |
| Q2-87   | 3710 | 3849  | 3891 | 3945  | 4641    |       |       |       |      |       |
| BG33R   | 3805 | 3845  | 3881 | 3761  | 3537    | 3535  |       |       |      |       |
| SBW25   | 3954 | 3898  | 3932 | 3858  | 3849    | 3783  | 4214  |       |      |       |
| A506    | 3811 | 3841  | 3845 | 3740  | 3589    | 3584  | 4441  | 4164  |      |       |
| SS101   | 3842 | 3879  | 3867 | 3751  | 3568    | 3563  | 4456  | 4202  | 4631 |       |

<sup>a</sup> Shading designates the number of CDSs shared between two strains within a sub-clade: pink, Sub-clade 1; blue, Sub-clade 2; green, Sub-clade 3.
