# Supplementary material for: Comparative Genomics of Plant-Associated Pseudomonas spp.: Insights into Diversity and Inheritance of Traits Involved in Multitrophic Interactions
Source: PLoS Genet. 2012 Jul 5;8(7):e1002784. doi: 10.1371/journal.pgen.1002784 (PMC3390384; doi:10.1371/journal.pgen.1002784)
Supplement: Table S7 — Genes shared by and unique to strains in Sub-clade 2 of the P. fluorescens group. Locus tags represent CDSs conserved among the genomes of strains Pf0-1, Q8r1-96, and Q2-87, but absent from the genomes of all other representative Pseudomonas spp. These CDSs were identified from comparative BLASTp searches of the predicted proteomes of representative Pseudomonas spp. (shown in Figure 1). (PDF) [file pgen.1002784.s017.pdf]

**Table S7.** Genes shared by and unique to Sub-clade 2<sup>a</sup>

| <b>Annotated function</b>                                                | <b>Pf0-1</b> | <b>Q8r1-96</b> | <b>Q2-87</b> |
|--------------------------------------------------------------------------|--------------|----------------|--------------|
| Nodulation efficiency protein NfeD                                       | Pfl01_0167   | PflQ8_0241     | PflQ2_5495   |
| Conserved hypothetical protein                                           | Pfl01_0296   | PflQ8_0328     | PflQ2_5408   |
| GCN5-related N-acetyltransferase                                         | Pfl01_0297   | PflQ8_0329     | PflQ2_5407   |
| Putative transport protein, AzlC family                                  | Pfl01_0298   | PflQ8_0330     | PflQ2_5406   |
| Transcriptional regulator, LysR family                                   | Pfl01_0299   | PflQ8_0331     | PflQ2_5405   |
| Conserved hypothetical protein                                           | Pfl01_0314   | PflQ8_0348     | PflQ2_5379   |
| PhoD family protein                                                      | Pfl01_0461   | PflQ8_0502     | PflQ2_5204   |
| Putative toxin protein                                                   | Pfl01_0608   | PflQ8_0649     | PflQ2_5060   |
| Sensory box domain protein                                               | Pfl01_1029   | PflQ8_1019     | PflQ2_4448   |
| Amino acid permease, APC family                                          | Pfl01_1043   | PflQ8_2343     | PflQ2_2349   |
| Conserved domain protein                                                 | Pfl01_1378   | PflQ8_1403     | PflQ2_4061   |
| Methyltransferase domain family                                          | Pfl01_1380   | PflQ8_1405     | PflQ2_4059   |
| GtrA family protein                                                      | Pfl01_1381   | PflQ8_1406     | PflQ2_4058   |
| Membrane protein, putative                                               | Pfl01_1382   | PflQ8_1407     | PflQ2_4057   |
| Conserved hypothetical protein                                           | Pfl01_1838   | PflQ8_3978     | PflQ2_1662   |
| DNA-binding response regulator, LuxR family                              | Pfl01_1863   | PflQ8_3955     | PflQ2_1687   |
| Conserved hypothetical protein                                           | Pfl01_1930   | PflQ8_3789     | PflQ2_1843   |
| Conserved hypothetical protein                                           | Pfl01_2012   | PflQ8_3850     | PflQ2_1785   |
| Transcriptional regulator, AraC family                                   | Pfl01_2224   | PflQ8_2504     | PflQ2_2942   |
| FAD dependent oxidoreductase                                             | Pfl01_2315   | PflQ8_4787     | PflQ2_0863   |
| Hydrolase, alpha/beta fold family                                        | Pfl01_2417   | PflQ8_0455     | PflQ2_5256   |
| Conserved hypothetical protein                                           | Pfl01_2418   | PflQ8_0762     | PflQ2_0684   |
| Response regulator receiver domain protein                               | Pfl01_2452   | PflQ8_2749     | PflQ2_3033   |
| Delta-60 repeat domain protein                                           | Pfl01_2590   | PflQ8_3163     | PflQ2_2476   |
| Protease inhibitor Inh                                                   | Pfl01_2679   | PflQ8_2859     | PflQ2_2792   |
| Conserved hypothetical protein                                           | Pfl01_3070   | PflQ8_2119     | PflQ2_3298   |
| Lipase                                                                   | Pfl01_3071   | PflQ8_2118     | PflQ2_3299   |
| Conserved hypothetical protein                                           | Pfl01_3338   | PflQ8_2586     | PflQ2_0015   |
| Type VI secretion system Vgr family protein                              | Pfl01_3678   | PflQ8_1955     | PflQ2_3488   |
| Conserved hypothetical protein                                           | Pfl01_3959   | PflQ8_1719     | PflQ2_3760   |
| Conserved hypothetical protein                                           | Pfl01_4132   | PflQ8_4097     | PflQ2_1546   |
| Transcriptional regulator, GntR family                                   | Pfl01_4144   | PflQ8_4104     | PflQ2_1539   |
| Tat (twin-arginine translocation) pathway signal sequence domain protein | Pfl01_4469   | PflQ8_4593     | PflQ2_1056   |
| Membrane protein, putative                                               | Pfl01_4512   | PflQ8_4475     | PflQ2_1171   |
| Autoinducer-binding transcriptional regulator, LuxR family               | Pfl01_4889   | PflQ8_5023     | PflQ2_4761   |
| Conserved hypothetical protein                                           | Pfl01_5217   | PflQ8_5380     | PflQ2_0504   |
| Conserved hypothetical protein                                           | Pfl01_5218   | PflQ8_5381     | PflQ2_0503   |
| Oxidoreductase, GMC family                                               | Pfl01_5219   | PflQ8_5382     | PflQ2_0502   |

<sup>a</sup> Genes are present in genomes of the strains found in Sub-clade 2, but are not present in the genomes of other *Pseudomonas* spp. in Figure 1.
